# Supplementary material
Source: PubMed Central journal article supplement (PMC3508089)
Supplement: NIHMS402517-supplement-1.pdf [file NIHMS402517-supplement-1.pdf]

## Supplementary Figure 1

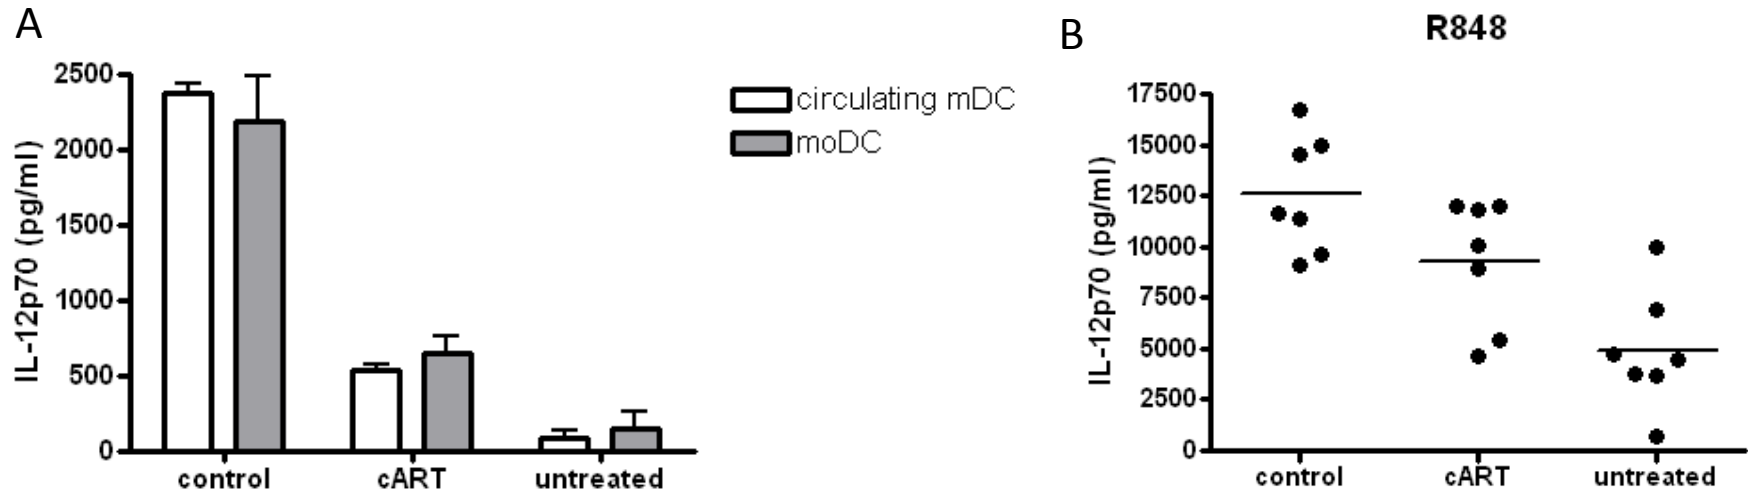

### Supplementary Figure 1: A) Suppression of IL-12p70 secretion by HIV plasma on circulating myeloid DC (mDC)

Circulating mDC from control PBMC were enriched and exposed to 10% plasma from each group (N=3 plasma donors per group) followed by Poly I:C stimulation. From the same PBMC donor, moDC were derived and subsequently exposed to the same plasma donors prior to stimulation with Poly I:C. Data displayed are representative of experiments performed on 2 separate PBMC donors

### B) Suppression of IL-12p70 secretion by HIV plasma following stimulation with a TLR 7/8 agonist

Measurement of IL-12p70 secretion by moDC from uninfected donors was performed following exposure to plasma from either control or HIV-infected subjects and subsequent stimulation with the TLR7/8 agonist, R848. The graph displays raw cytokine data from a single representative moDC donor following plasma exposure and stimulation. Each dot represents an individual plasma donor.
