# Supplementary material
Source: PubMed Central journal article supplement (PMC3508089)
Supplement: NIHMS402517-supplement-2.pdf [file NIHMS402517-supplement-2.pdf]

## Supplementary Figure 2

A

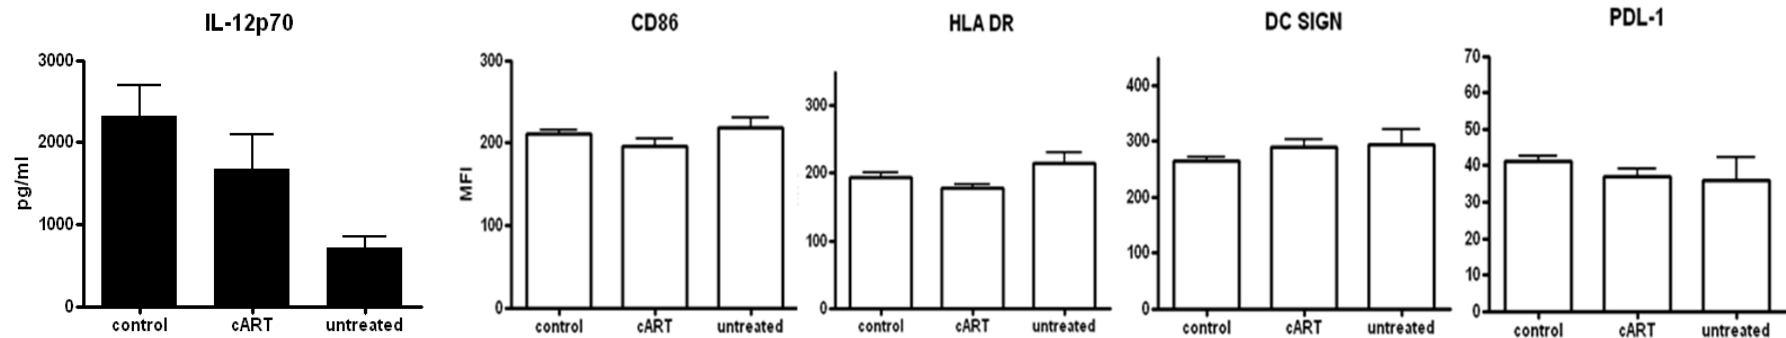

B

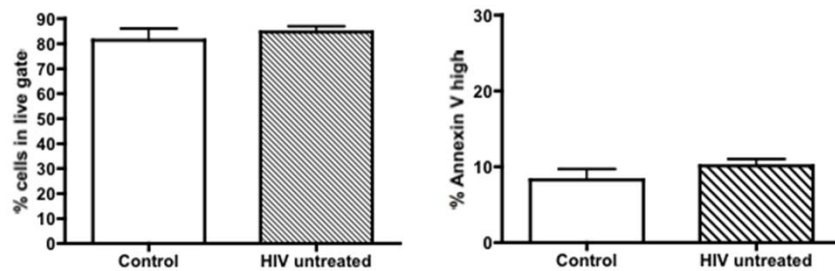

**Supplementary Figure 2: A) Phenotype of moDC following HIV plasma exposure and stimulation** MoDC were exposed to plasma from controls versus HIV-infected donors (N=5 per group) and stimulated with Poly I:C. Supernatants were assayed for IL-12p70 levels (Left) and surface expression of CD86, HLA DR, DC SIGN, and PDL-1 was measured via FACS (Right). **B) No evidence for cell-death-mediated suppression of moDC function by HIV plasma** Cell viability of moDC exposed to plasma from controls versus HIV-infected donors (N=3 per group) was measured by forward scatter/side scatter characteristics (live gate percent) via FACS (Left) and annexin V staining (Right). Data displayed are representative of experiments performed on 3 separate moDC donors.
