# Supplementary material
Source: PubMed Central journal article supplement (PMC3508089)
Supplement: NIHMS402517-supplement-3.pdf [file NIHMS402517-supplement-3.pdf]

## Supplementary Figure 3

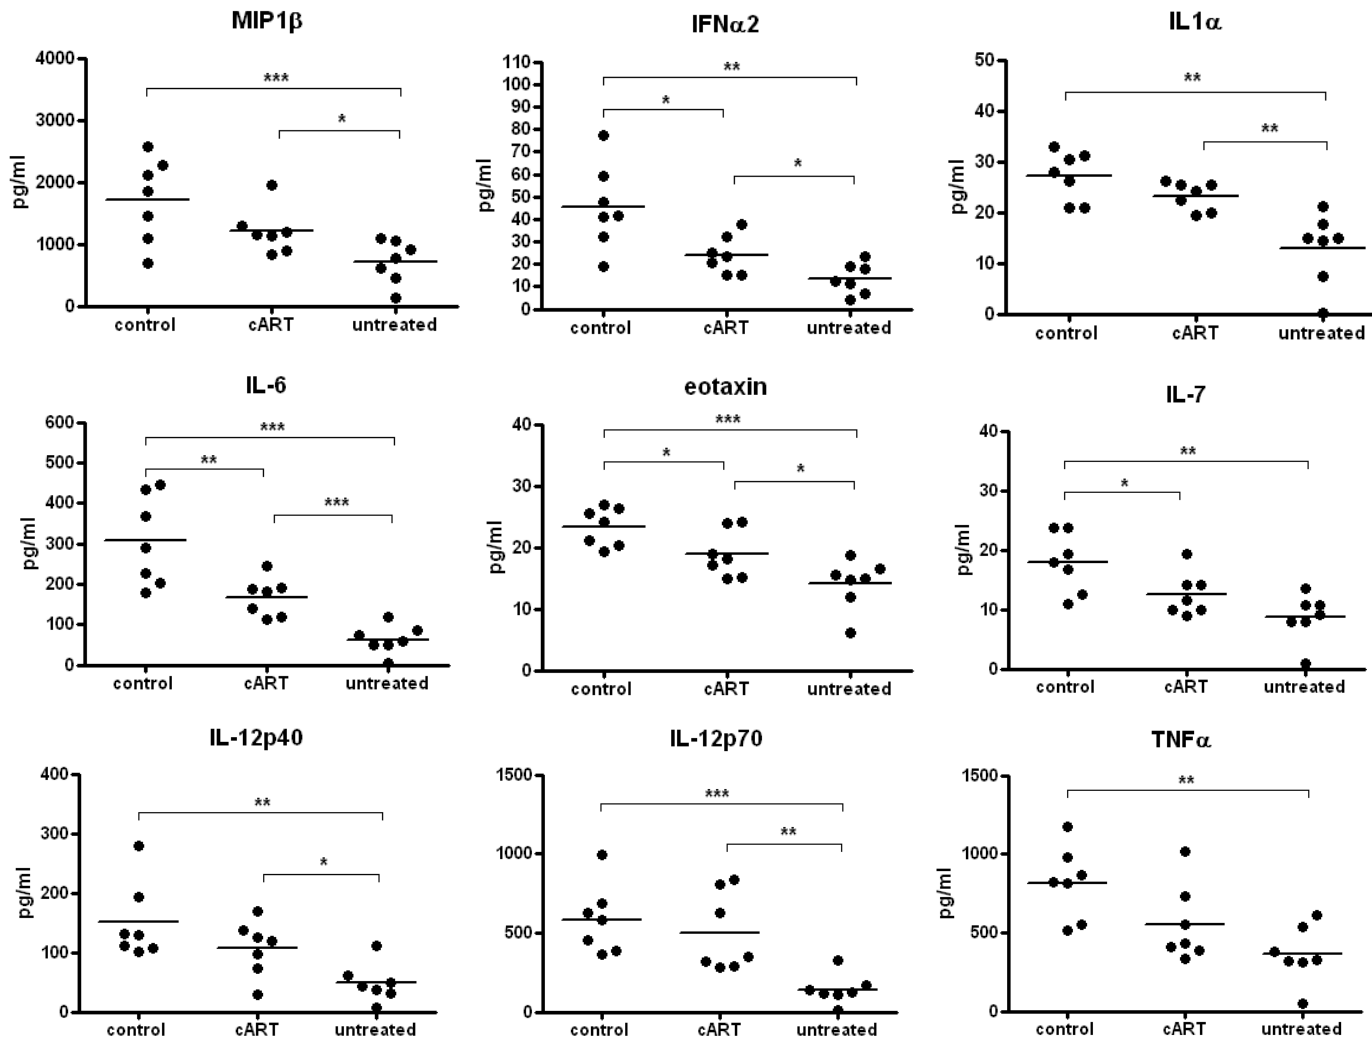

**Supplementary Figure 3: Luminex analysis of moDC: naïve CD4<sup>+</sup> T cell co-culture supernatant.** Luminex analysis was performed on supernatants following moDC: naïve CD4 T cell co-culture (MILLIPIX MAP Human Cytokine/Chemokine Panel I, Millipore, [http://www.millipore.com/bmia/flx4/bmia\\_immunology#tab1=2](http://www.millipore.com/bmia/flx4/bmia_immunology#tab1=2)). Significant differences are displayed above. The asterisks indicate p values: \*\*\*p<0.001, \*\*p < .01, \*p < .05.
