# Supplementary material
Source: PubMed Central journal article supplement (PMC3508089)
Supplement: NIHMS402517-supplement-4.pdf [file NIHMS402517-supplement-4.pdf]

## Supplementary Figure 4

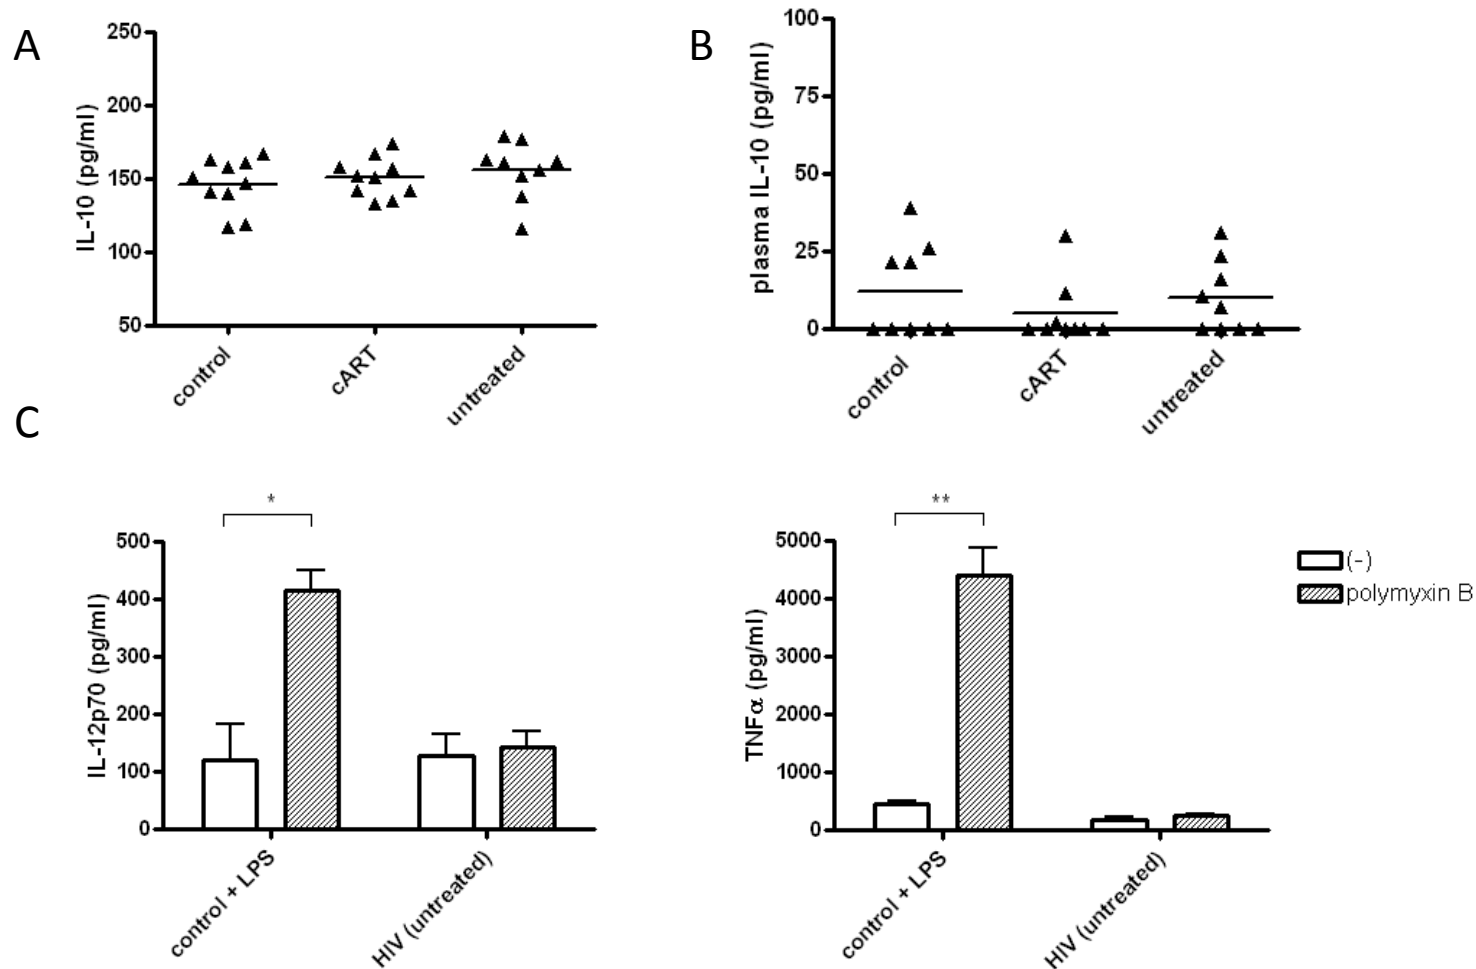

**Supplementary Figure 4: No evidence for IL-10 or LPS mediated suppression of moDC function by HIV plasma** A) IL-10 secretion by plasma-exposed moDC following stimulation with Poly I:C. Each dot represents an individual plasma donor (mean of 2 replicates per donor) B) IL-10 levels in donor plasma measured via Luminex analysis. C) MoDC were exposed to plasma from untreated HIV-infected donors or to control plasma supplemented with low-level LPS(100pg/ml) during culture +/- polymyxin B (50µg/ml) and subsequently stimulated with Poly I:C. Data displayed in **A and C** are representative of experiments performed on 3 separate moDC donors. The asterisks indicate p values: \*\*p < .01, \*p < .05.
